# Supplementary material for: Protein Aggregation and Protein Instability Govern Familial Amyotrophic Lateral Sclerosis Patient Survival
Source: PubMed Central journal article supplement (PMC2486295; doi:10.1371/journal.pbio.0060170), 2008-07-29

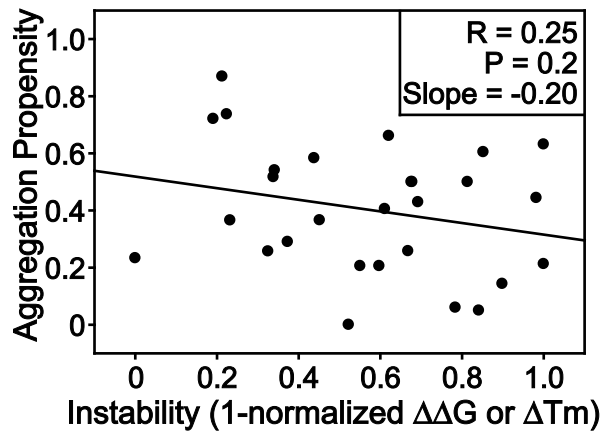

Supplement: pbio.0060170.sg001.pdf [file pbio.0060170.sg001.pdf]
